# Supplementary material for: Effectiveness of Mix-and-Match Vaccination in Preventing SARS-CoV-2 Omicron Variant Infection in Taiwan: A Test-Negative Control Study
Source: MDPI journal article supplement (doi:10.3390/vaccines11091441), 2023-08-31
Supplement: s1 [file s1]

## Supplementary Materials

### Supplementary Figures

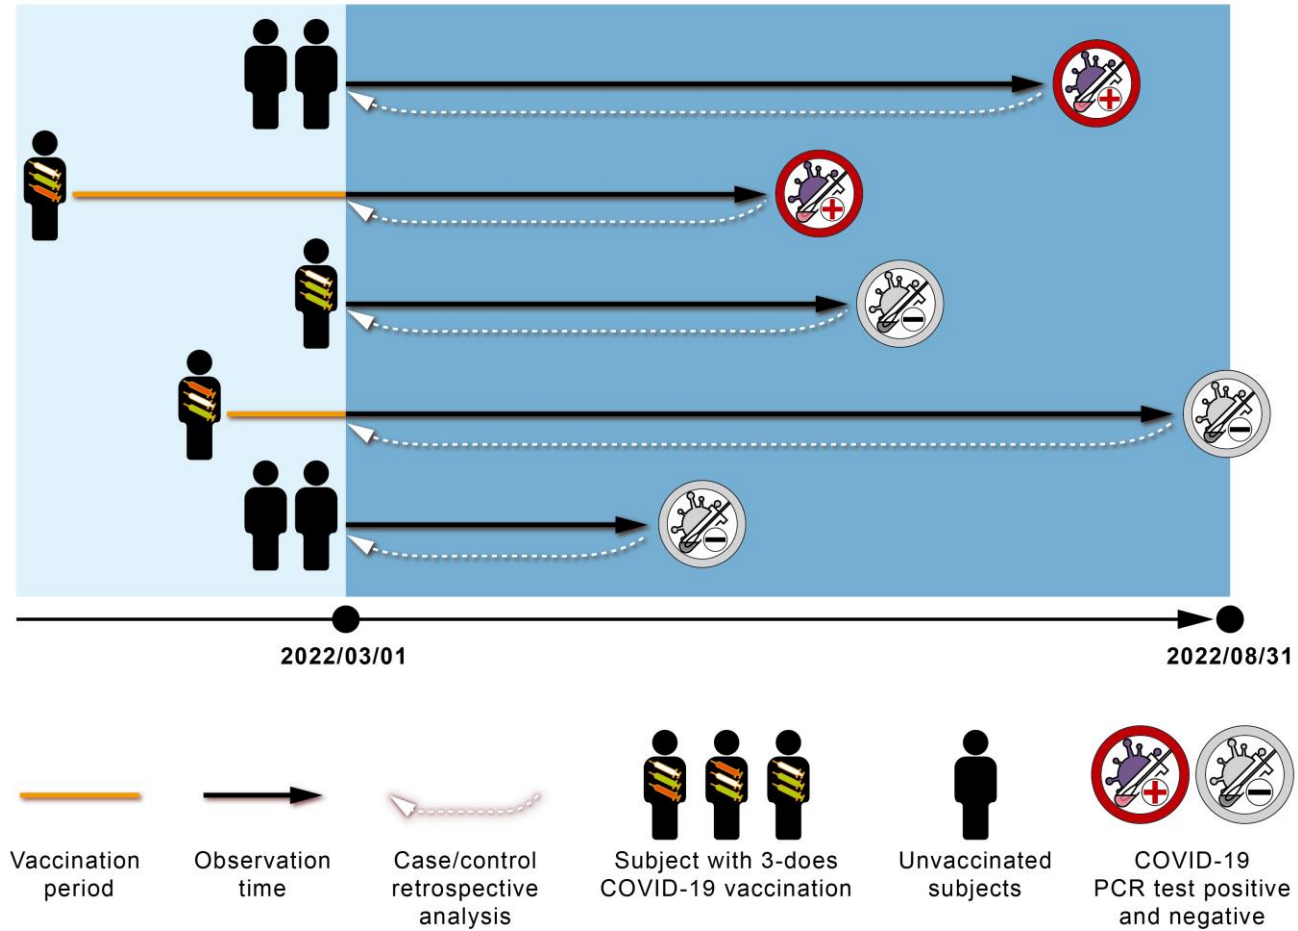

**Supplementary Figure S1.** Conceptual schematic of study design.

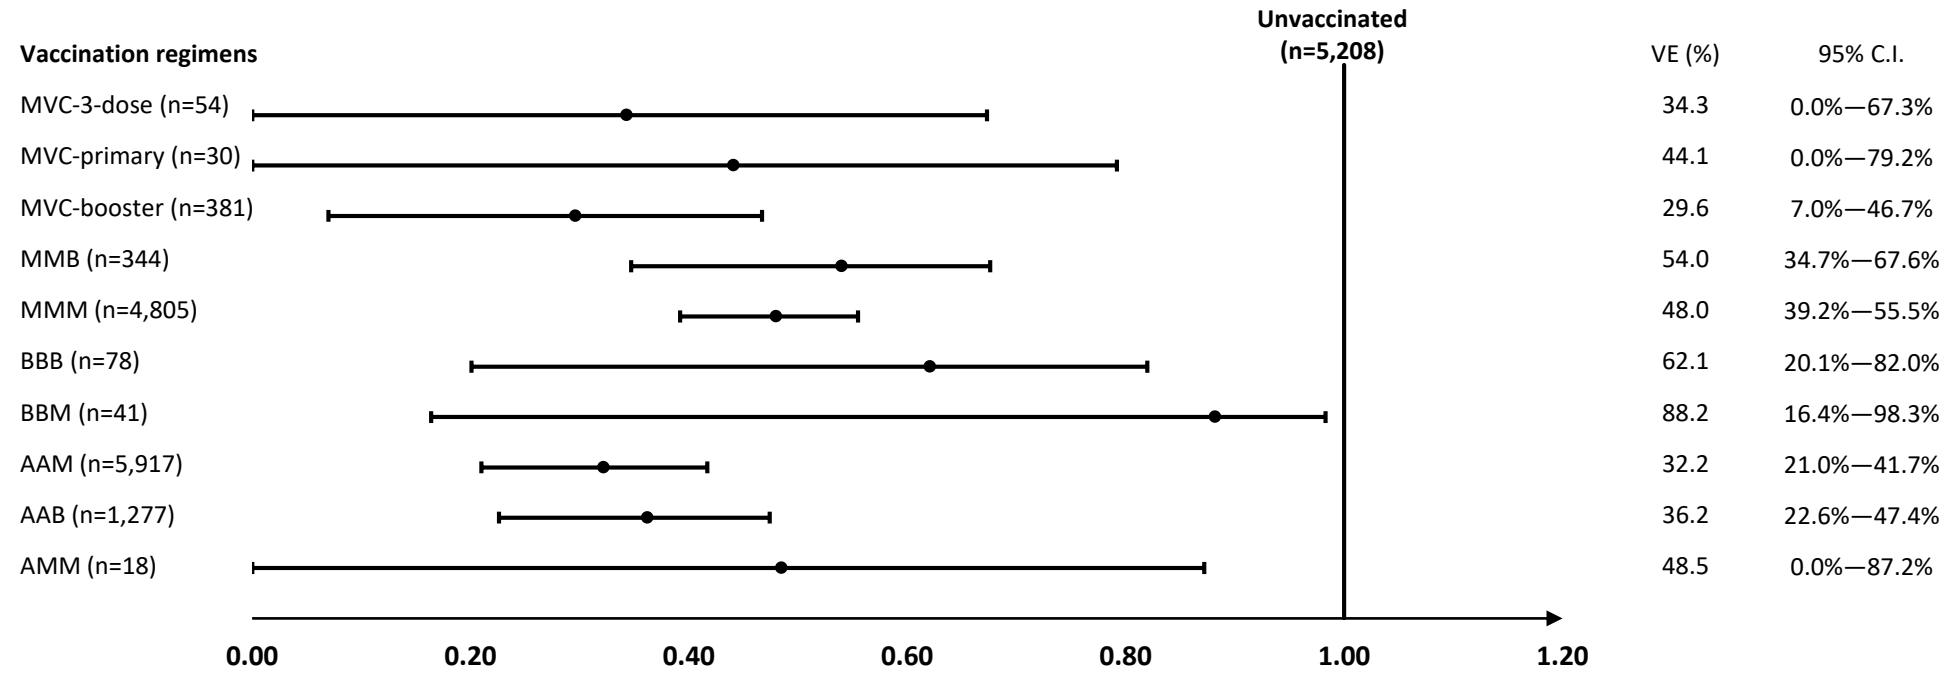

**Supplementary Figure S2A.** Forest plot of vaccine effectiveness against SARS-CoV-2 infection in persons > 75 years old.

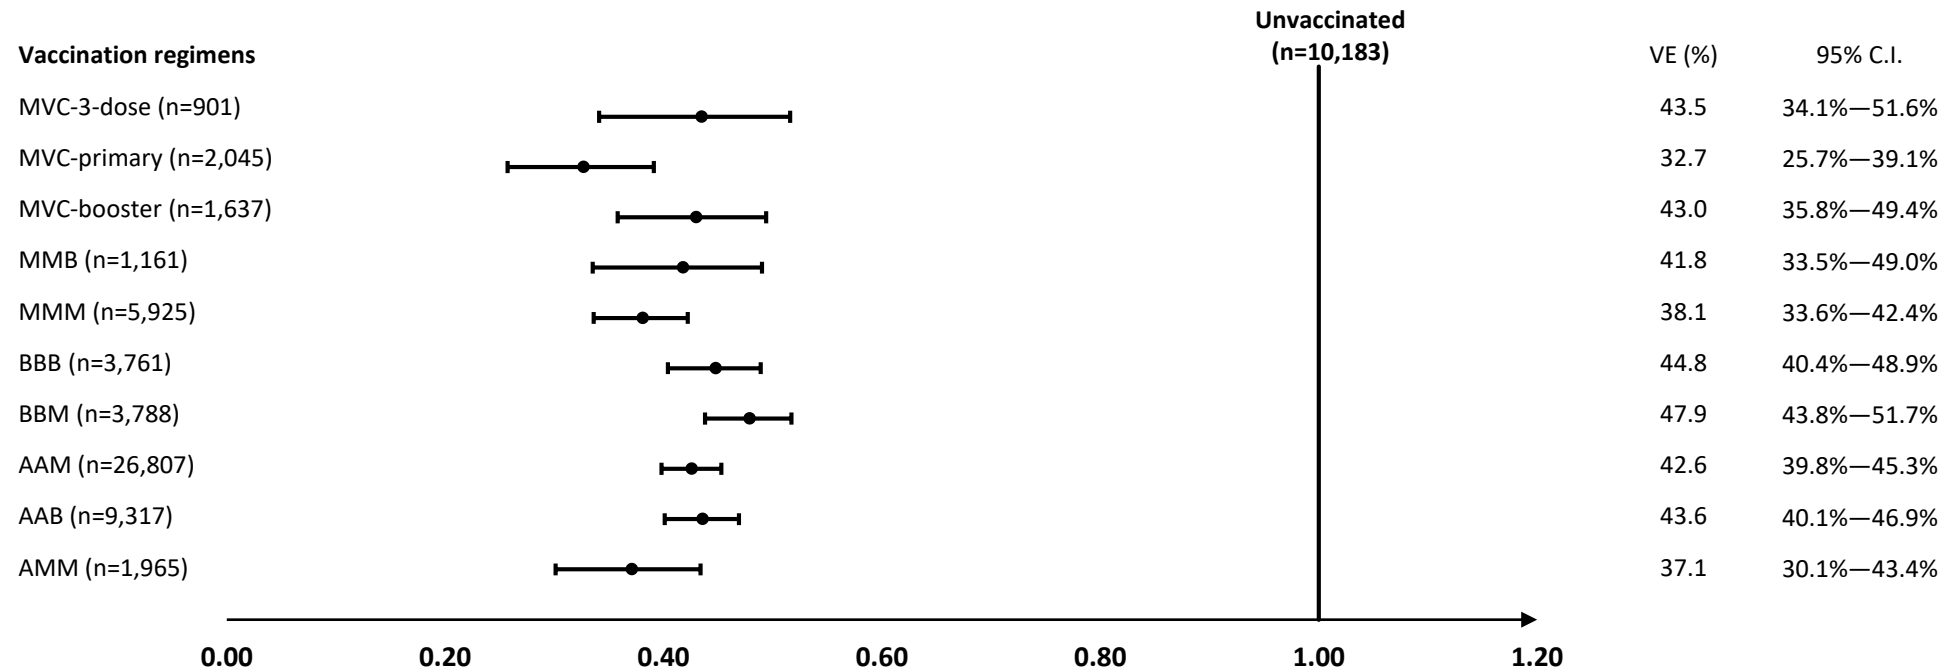

**Supplementary Figure S2B.** Forest plot of vaccine effectiveness against SARS-CoV-2 infection in persons 20 to 49 years old.

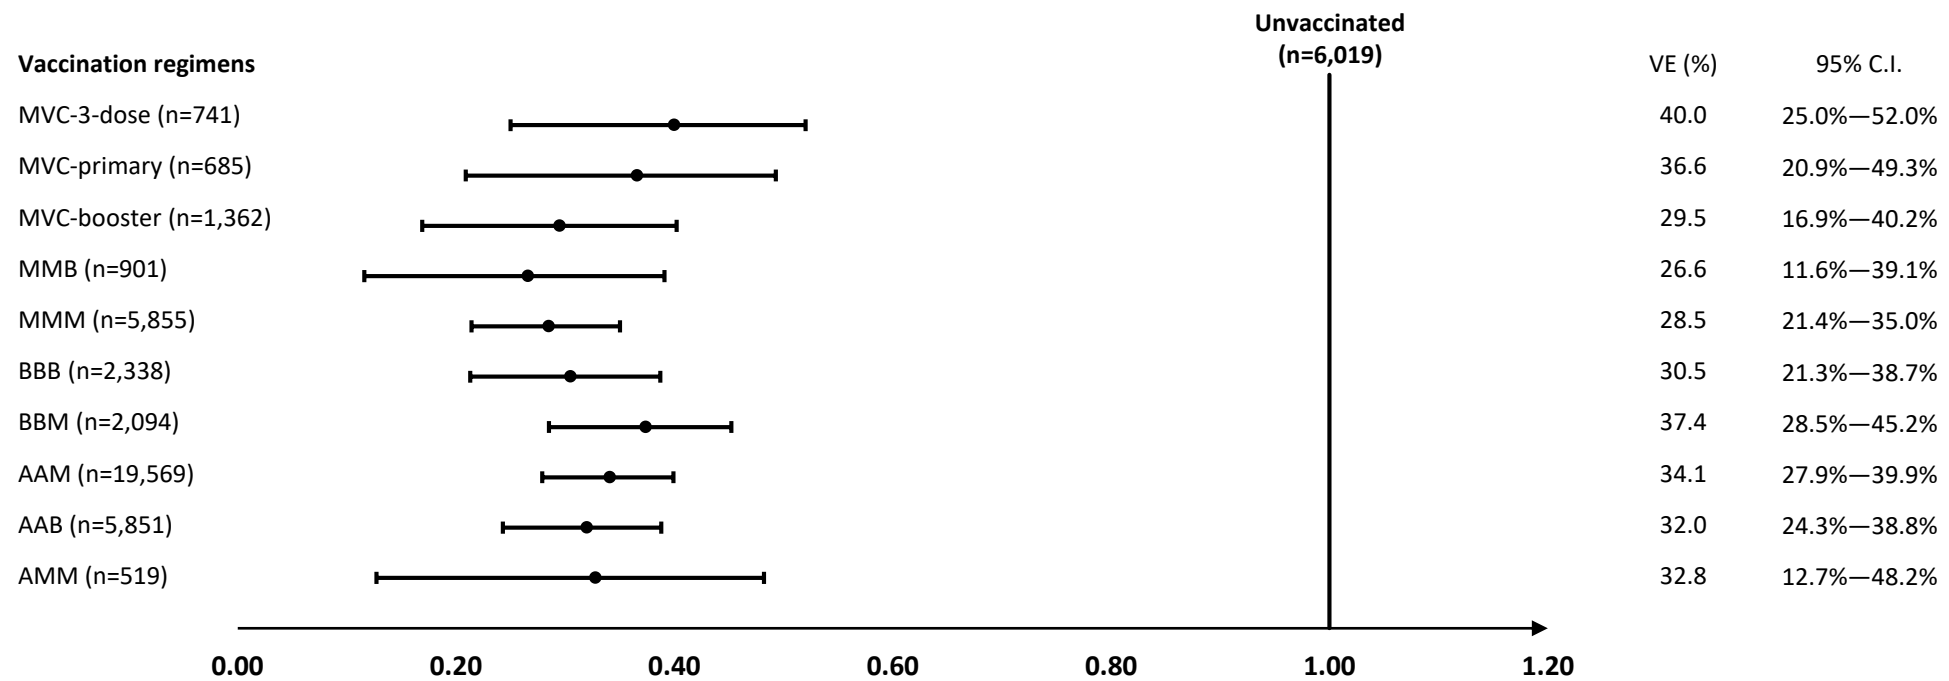

**Supplementary Figure S2C.** Forest plot of vaccine effectiveness against SARS-CoV-2 infection in persons 50 to 64 years old.

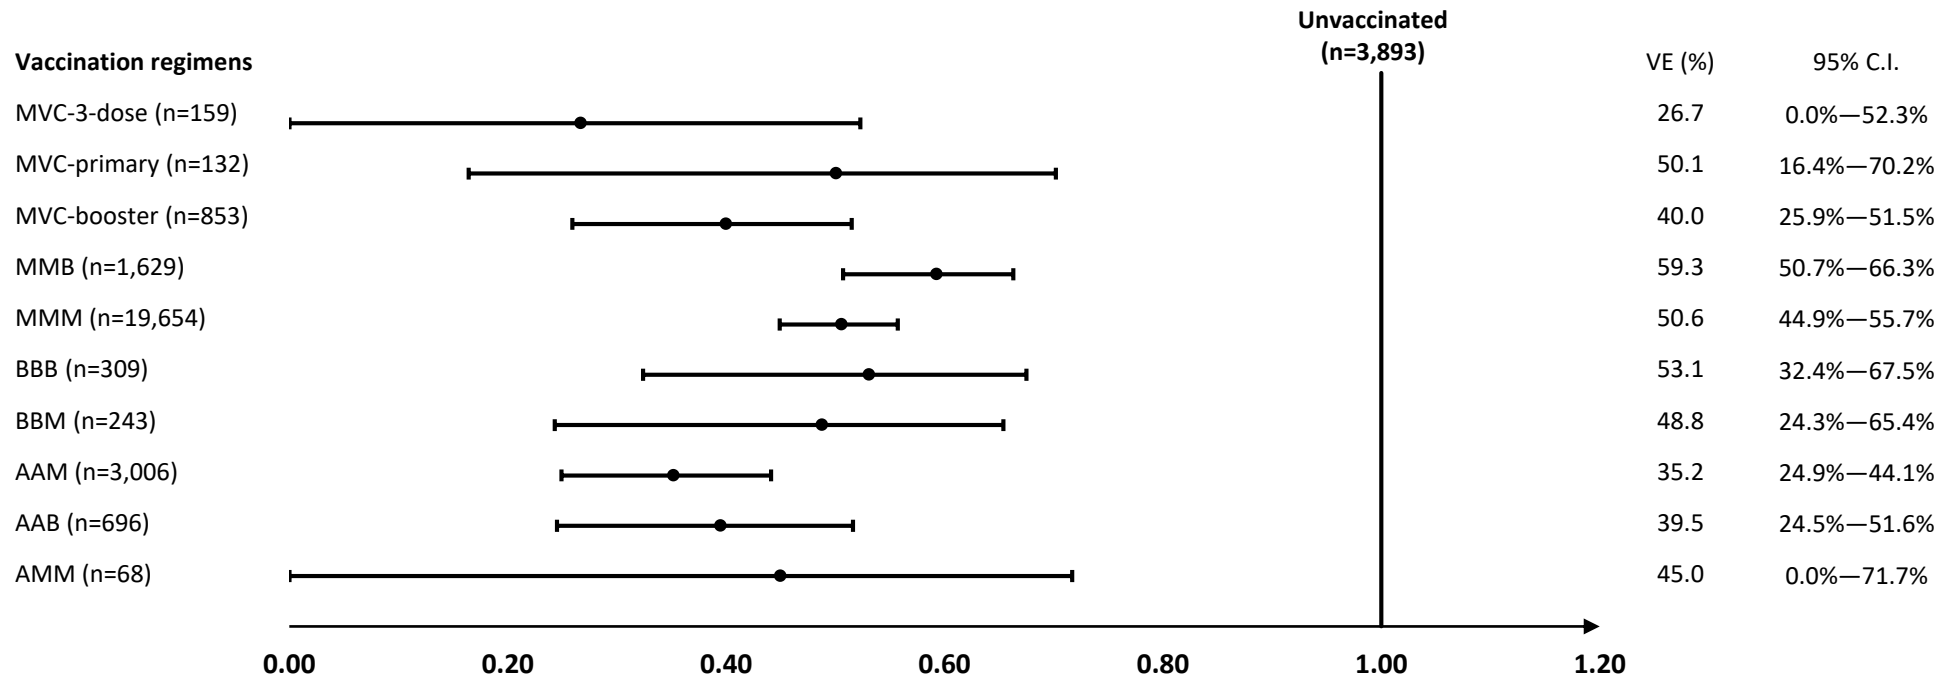

**Supplementary Figure S2D.** Forest plot of vaccine effectiveness against SARS-CoV-2 infection in persons 65 to 74 years old.

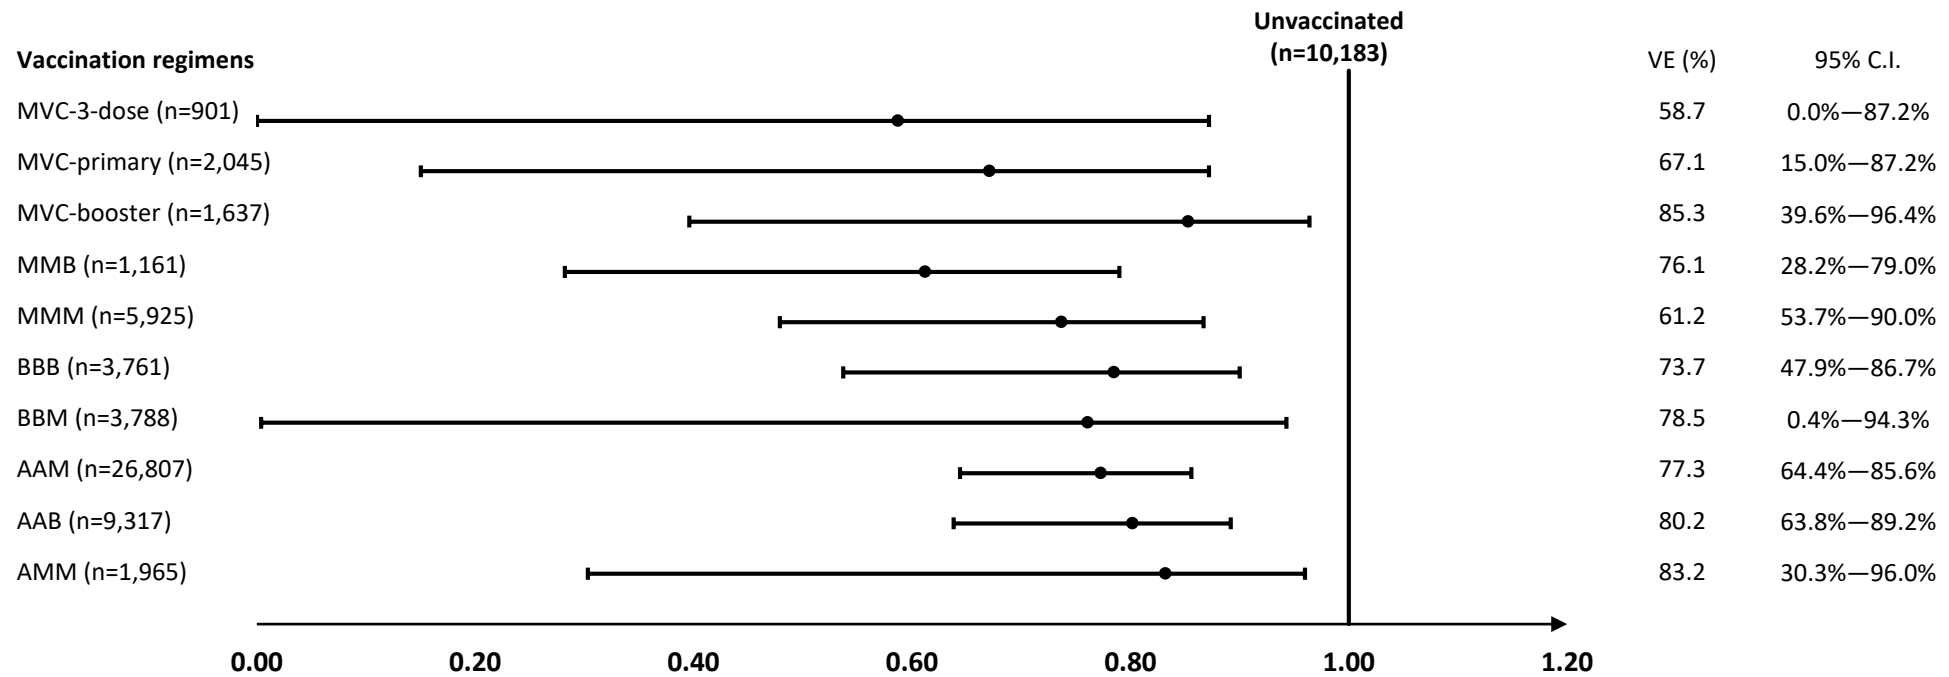

**Supplementary Figure S3A.** Forest plot of vaccine effectiveness against COVID-19 associated moderate to severe disease in persons 20 to 49 years old.

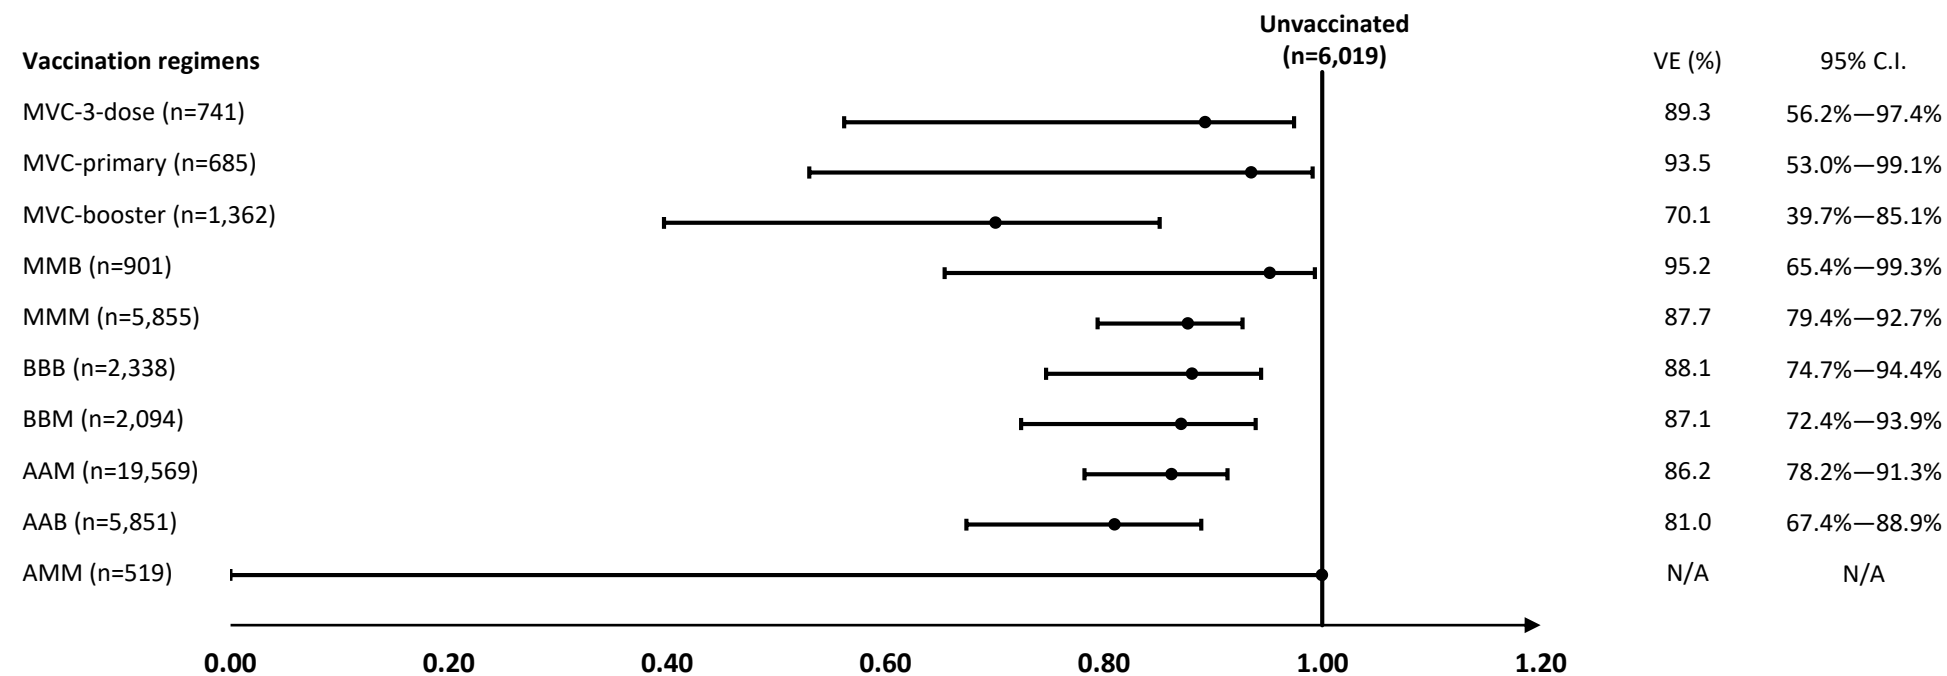

**Supplementary Figure S3B.** Forest plot of vaccine effectiveness against COVID-19 associated moderate to severe disease in persons 50 to 64 years old.

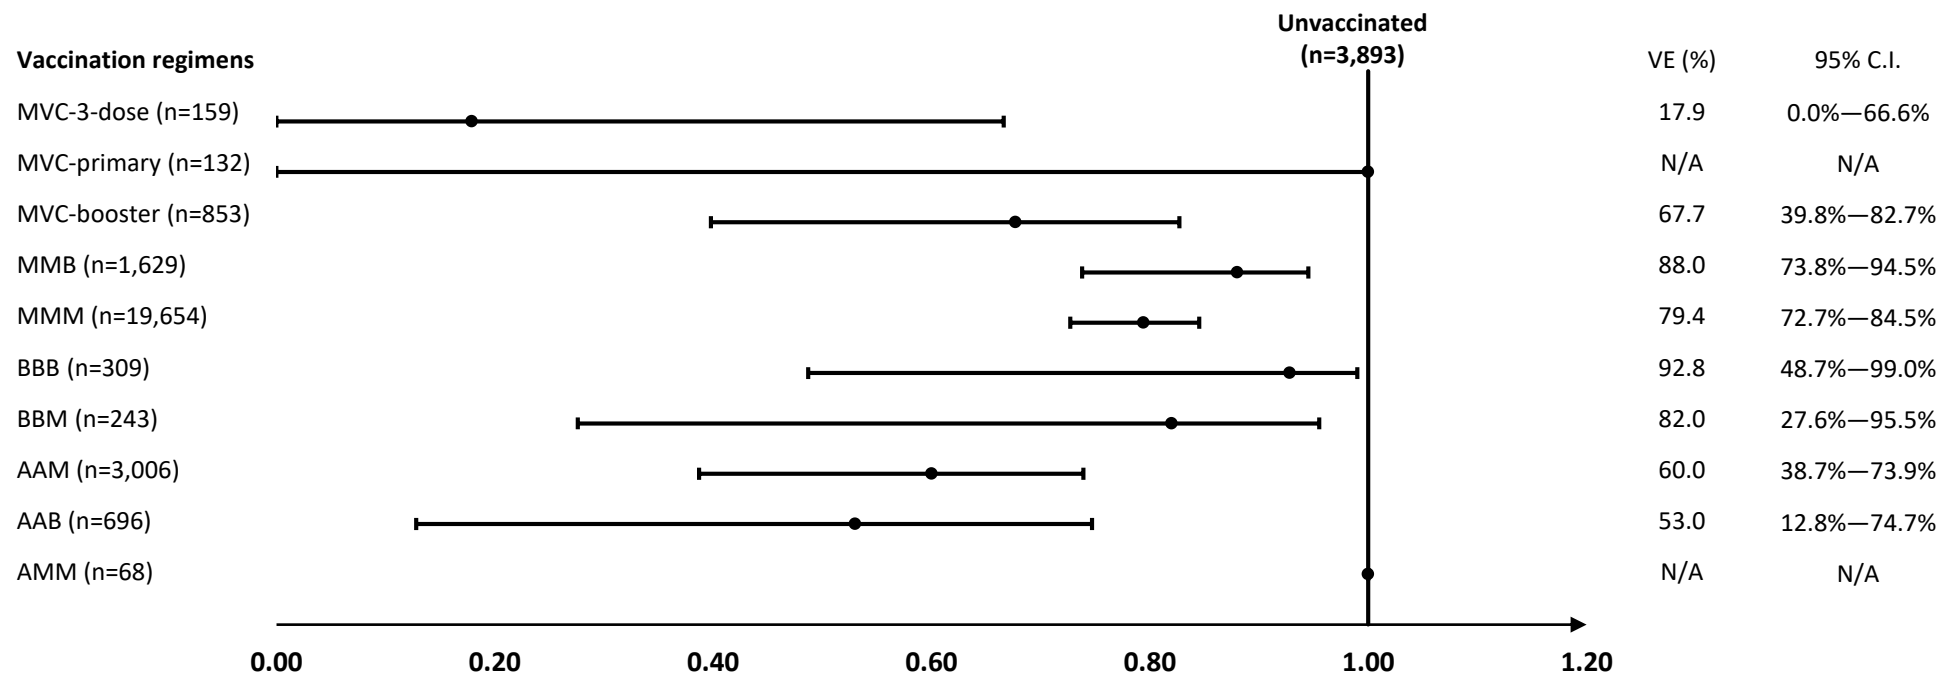

**Supplementary Figure S3C.** Forest plot of vaccine effectiveness against COVID-19 associated moderate to severe disease in persons 65 to 74 years old.



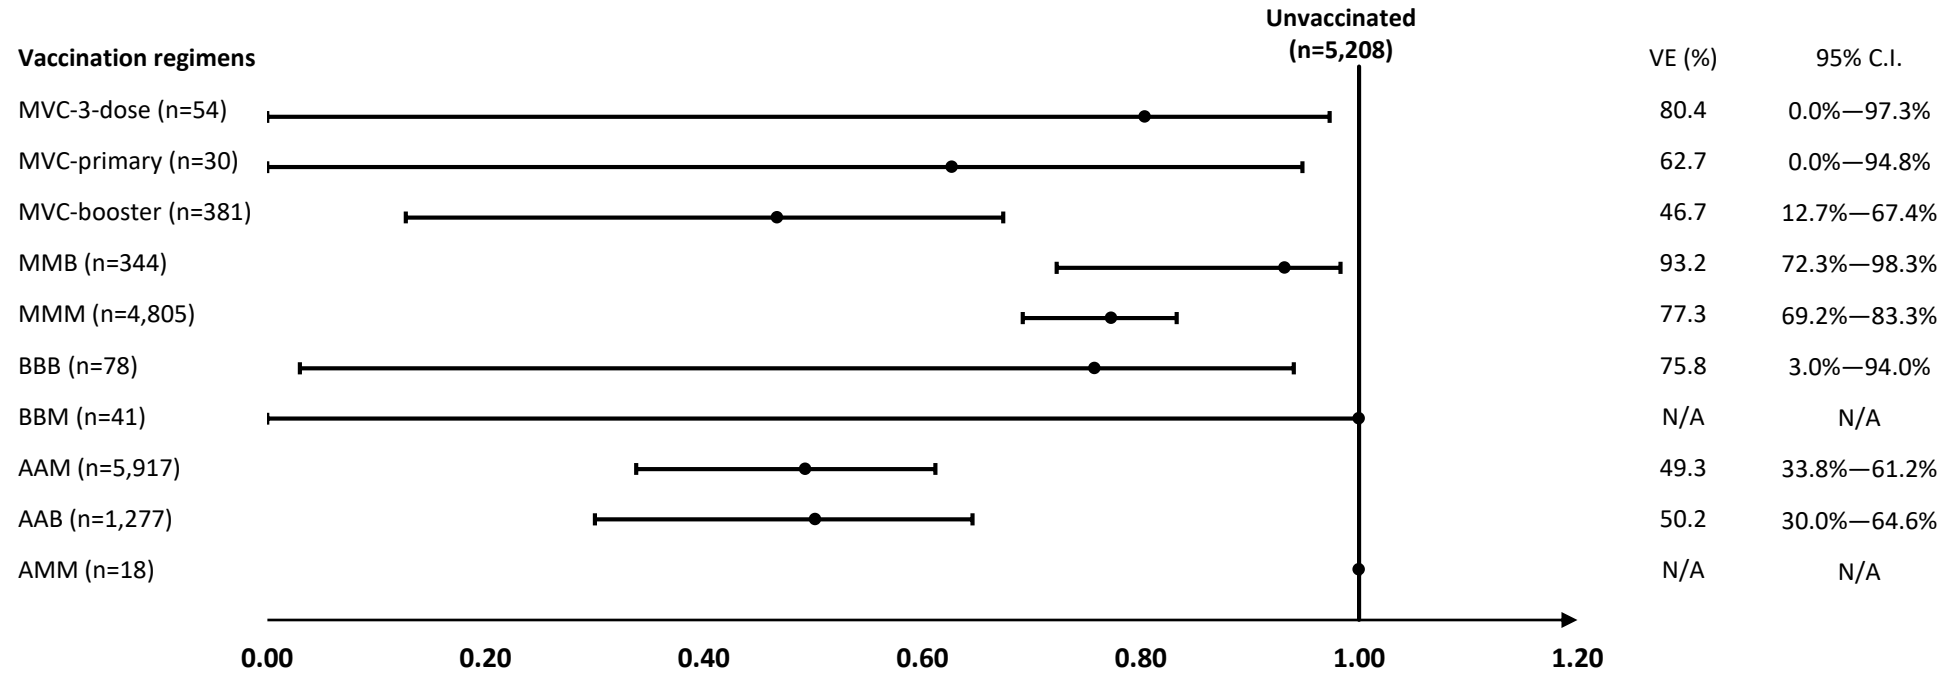

**Supplementary Figure S3D.** Forest plot of vaccine effectiveness against COVID-19 associated moderate to severe disease in persons > 75 years old.

## Supplementary Tables

**Supplementary Table S1.** Age distribution of each group.

| <b>Vaccine group</b>     | <b>Total vaccinees</b> | <b>Mean</b> | <b>SD</b> | <b>20—49</b> | <b>%</b> | <b>50—64</b> | <b>%</b> | <b>65—74</b> | <b>%</b> | <b>Above 75</b> | <b>%</b> |
|--------------------------|------------------------|-------------|-----------|--------------|----------|--------------|----------|--------------|----------|-----------------|----------|
| Unvaccinated             | 25,303                 | 56.12       | 19.40     | 10,183       | 40.24    | 6,019        | 23.79    | 3,893        | 15.39    | 5,208           | 20.58    |
| MVC-3-dose <sup>a</sup>  | 1,855                  | 49.93       | 13.35     | 901          | 48.57    | 741          | 39.95    | 159          | 8.57     | 54              | 2.91     |
| MVC-primary <sup>b</sup> | 2,892                  | 42.27       | 13.22     | 2,045        | 70.71    | 685          | 23.69    | 132          | 4.56     | 30              | 1.04     |
| MVC-booster <sup>c</sup> | 4,233                  | 55.16       | 14.83     | 1,637        | 38.67    | 1,362        | 32.18    | 853          | 20.15    | 381             | 9.00     |
| MMB                      | 4,035                  | 58.00       | 15.78     | 1,161        | 28.77    | 901          | 22.33    | 1,629        | 40.37    | 344             | 8.53     |
| MMM                      | 36,239                 | 63.44       | 13.83     | 5,925        | 16.35    | 5,855        | 16.16    | 19,654       | 54.23    | 4,805           | 13.26    |
| BBB                      | 6,486                  | 45.91       | 13.46     | 3,761        | 57.99    | 2,338        | 36.05    | 309          | 4.76     | 78              | 1.20     |
| BBM                      | 6,166                  | 44.97       | 12.78     | 3,788        | 61.43    | 2,094        | 33.96    | 243          | 3.94     | 41              | 0.66     |
| AAM                      | 55,299                 | 50.80       | 16.30     | 26,807       | 48.48    | 19,569       | 35.39    | 3,006        | 5.44     | 5,917           | 10.70    |
| AAB                      | 17,141                 | 49.09       | 15.01     | 9,317        | 54.36    | 5,851        | 34.13    | 696          | 4.06     | 1,277           | 7.45     |
| AMM                      | 2,570                  | 40.74       | 12.21     | 1,965        | 76.46    | 519          | 20.19    | 68           | 2.65     | 18              | 0.70     |
| Total                    | 162,219                | 53.83       | 16.94     | 67,490       | 41.60    | 45,934       | 28.32    | 30,642       | 18.89    | 18,153          | 11.19    |

Abbreviation: SD, standard deviation; A, ChAdOx1 nCoV-19; M, mRNA-1273; B, BNT162b2; MVC, MCV-COV1901

<sup>a</sup> MVC-3-dose, vaccinees received 3 doses of MCV-COV1901;

<sup>b</sup> MVC-primary, vaccinees received 2 doses of MCV-COV1901 as primary series;

<sup>c</sup> MVC-booster, vaccinees received MCV-COV1901 as the booster.

**Supplementary Table S2.** Interval between the days when vaccinees received the 3<sup>rd</sup> dose of COVID-19 to 1<sup>st</sup> March, 2022.

| Vaccine group            | Total   | Mean | SD   | <4 weeks | %     | 4–8 weeks | %     | >8 weeks | %    |
|--------------------------|---------|------|------|----------|-------|-----------|-------|----------|------|
| MVC-3-dose <sup>a</sup>  | 1,855   | 4.07 | 2.08 | 916      | 49.38 | 936       | 50.46 | 3        | 0.16 |
| MVC-primary <sup>b</sup> | 2,892   | 4.95 | 2.48 | 875      | 30.26 | 1,984     | 68.60 | 33       | 1.14 |
| MVC-booster <sup>c</sup> | 4,233   | 4.40 | 2.29 | 1,888    | 44.60 | 2,233     | 52.75 | 112      | 2.65 |
| MMB                      | 4,035   | 4.61 | 1.97 | 1,462    | 36.23 | 2,522     | 62.50 | 51       | 1.26 |
| MMM                      | 36,239  | 5.10 | 2.29 | 10,887   | 30.04 | 23,676    | 65.33 | 1,676    | 4.62 |
| BBB                      | 6,486   | 1.95 | 1.88 | 6,162    | 95.00 | 245       | 3.78  | 79       | 1.22 |
| BBM                      | 6,166   | 1.73 | 1.14 | 6,004    | 97.37 | 155       | 2.51  | 7        | 0.11 |
| AAM                      | 55,299  | 5.61 | 2.37 | 13,830   | 25.01 | 38,188    | 69.06 | 3,281    | 5.93 |
| AAB                      | 17,141  | 4.70 | 2.08 | 6,103    | 35.60 | 10,761    | 62.78 | 277      | 1.62 |
| AMM                      | 2,570   | 4.85 | 2.61 | 950      | 36.96 | 1,607     | 62.53 | 13       | 0.51 |
| Total                    | 162,219 | 4.90 | 2.47 | 74,380   | 45.85 | 82,307    | 50.74 | 5,532    | 3.41 |

Abbreviation: SD, standard deviation; A, ChAdOx1 nCoV-19; M, mRNA-1273; B, BNT162b2; MVC, MCV-COV1901

<sup>a</sup> MVC-3-dose, vaccinees received 3 doses of MCV-COV1901;

<sup>b</sup> MVC-primary, vaccinees received 2 doses of MCV-COV1901 as primary series;

<sup>c</sup> MVC-booster, vaccinees received MCV-COV1901 as the booster.

**Supplementary Table S3.** Demographics between the vaccinated and unvaccinated groups.

| Characteristic             | Total<br>(N=162,219) |       | Unvaccinated<br>(n=25,303) |       | Vaccinated<br>(n=136,916) |       | ASMD  |
|----------------------------|----------------------|-------|----------------------------|-------|---------------------------|-------|-------|
|                            | N                    | %     | N                          | %     | N                         | %     |       |
| Age group                  |                      |       |                            |       |                           |       | 0.193 |
| 20–49                      | 67,490               | 41.60 | 10,183                     | 40.24 | 57,307                    | 41.86 |       |
| 50–64                      | 45,934               | 28.32 | 6,019                      | 23.79 | 39,915                    | 29.15 |       |
| 65–74                      | 30,642               | 18.89 | 3,893                      | 15.39 | 26,749                    | 19.54 |       |
| 75+                        | 18,153               | 11.19 | 5208                       | 20.58 | 12,945                    | 9.45  |       |
| Sex                        |                      |       |                            |       |                           |       | 0.044 |
| Female                     | 92,341               | 56.92 | 13,938                     | 55.08 | 78,403                    | 57.26 |       |
| Male                       | 69,878               | 43.08 | 11,365                     | 44.92 | 58,513                    | 42.74 |       |
| Region                     |                      |       |                            |       |                           |       | 0.019 |
| South <sup>a</sup>         | 66,861               | 41.22 | 10,226                     | 40.41 | 56,635                    | 41.36 |       |
| North <sup>b</sup>         | 95,358               | 58.78 | 15,077                     | 59.59 | 80,281                    | 58.64 |       |
| Major illness <sup>c</sup> |                      |       |                            |       |                           |       | 0.588 |
| without                    | 141,067              | 86.96 | 17,870                     | 70.62 | 123,197                   | 89.98 |       |
| with                       | 21,152               | 13.04 | 7,433                      | 29.38 | 13,719                    | 10.02 |       |

Abbreviation: ASMD, absolute standardized mean difference

<sup>a</sup> Persons enrolled from southern Taiwan (Kaohsiung, Yunlin, and Chiayi)

<sup>b</sup> Persons enrolled from northern Taiwan (Kee-lung, Taipei, New Taipei City, Taoyuan)

<sup>c</sup> Subjects who had major illness according to the National Health Insurance Administration

<sup>d</sup> The duration between the days when vaccinees received the 3<sup>rd</sup> dose of COVID-19 vaccine and 1<sup>st</sup> March, 2022

**Supplementary Table S4A.** Estimated hazard ratio of infection and vaccine effectiveness against SARS-CoV-2 infection

| <b>Vaccine Group</b>           | <b>HR</b> | <b>95% CI</b> | <b>VE (%)</b> | <b>95% CI</b> | <b><i>p</i>-value</b> |
|--------------------------------|-----------|---------------|---------------|---------------|-----------------------|
| <b>unvaccinated</b>            | 1.00      |               | 0.0           |               |                       |
| <b>MVC-3-dose<sup>a</sup></b>  | 0.55      | 0.49–0.62     | 44.8          | 37.9%–51.0%   | <.0001                |
| <b>MVC-primary<sup>b</sup></b> | 0.62      | 0.57–0.67     | 38.3          | 32.6%–43.5%   | <.0001                |
| <b>MVC-booster<sup>c</sup></b> | 0.60      | 0.55–0.65     | 39.9          | 34.7%–44.6%   | <.0001                |
| <b>MMB</b>                     | 0.52      | 0.48–0.57     | 47.7          | 42.9%–52.2%   | <.0001                |
| <b>MMM</b>                     | 0.56      | 0.53–0.58     | 44.5          | 42.1%–46.8%   | <.0001                |
| <b>BBB</b>                     | 0.54      | 0.50–0.57     | 46.3          | 42.9%–49.6%   | <.0001                |
| <b>BBM</b>                     | 0.51      | 0.48–0.54     | 49.0          | 45.7%–52.2%   | <.0001                |
| <b>AAM</b>                     | 0.58      | 0.55–0.60     | 42.4          | 40.2%–44.6%   | <.0001                |
| <b>AAB</b>                     | 0.57      | 0.55–0.60     | 42.7          | 40.0%–45.4%   | <.0001                |
| <b>AMM</b>                     | 0.60      | 0.55–0.66     | 39.9          | 33.9%–45.4%   | <.0001                |

Abbreviation: HR, hazard ratios; CI, confidence interval; VE, vaccine effectiveness; A, ChAdOx1 nCoV-19; M, mRNA-1273; B, BNT162b2; MVC, MVC-COV1901

<sup>a</sup> MVC-3-dose, vaccinees received 3 doses of MVC-COV1901;

<sup>b</sup> MVC-primary, vaccinees received 2 doses of MVC-COV1901 as primary series;

<sup>c</sup> MVC-booster, vaccinees received MVC-COV1901 as the booster.

**Supplementary Table S4B.** Estimated hazard ratio of infection and vaccine effectiveness against COVID-19 associated moderate to severe disease.

| <b>Vaccine Group</b>           | <b>HR</b> | <b>95% CI</b> | <b>VE (%)</b> | <b>95% CI</b> | <b>p-value</b> |
|--------------------------------|-----------|---------------|---------------|---------------|----------------|
| <b>unvaccinated</b>            | 1.00      |               | 0.0           |               |                |
| <b>MVC-3-dose<sup>a</sup></b>  | 0.30      | 0.16–0.54     | 70.1          | 45.6%–83.6%   | <.0001         |
| <b>MVC-primary<sup>b</sup></b> | 0.20      | 0.10–0.43     | 79.6          | 56.7%–90.4%   | <.0001         |
| <b>MVC-booster<sup>c</sup></b> | 0.34      | 0.25–0.47     | 66.1          | 52.9%–75.5%   | <.0001         |
| <b>MMB</b>                     | 0.10      | 0.06–0.17     | 90.3          | 82.6%–94.5%   | <.0001         |
| <b>MMM</b>                     | 0.19      | 0.16–0.23     | 80.8          | 77.1%–83.8%   | <.0001         |
| <b>BBB</b>                     | 0.18      | 0.11–0.28     | 82.5          | 72.4%–88.9%   | <.0001         |
| <b>BBM</b>                     | 0.17      | 0.10–0.27     | 83.5          | 72.9%–90.0%   | <.0001         |
| <b>AAM</b>                     | 0.30      | 0.25–0.36     | 69.7          | 63.9%–74.6%   | <.0001         |
| <b>AAB</b>                     | 0.30      | 0.24–0.38     | 69.9          | 61.9%–76.2%   | <.0001         |
| <b>AMM</b>                     | 0.09      | 0.02–0.35     | 91.4          | 65.5%–97.9%   | <.0001         |

Abbreviation: HR, hazard ratios; CI, confidence interval; VE, vaccine effectiveness; A, ChAdOx1 nCoV-19; M, mRNA-1273; B, BNT162b2; MVC, MVC-COV1901

<sup>a</sup> MVC-3-dose, vaccinees received 3 doses of MVC-COV1901;

<sup>b</sup> MVC-primary, vaccinees received 2 doses of MVC-COV1901 as primary series;

<sup>c</sup> MVC-booster, vaccinees received MVC-COV1901 as the booster.

**Supplementary Table S5A.** Estimated hazard ratio of infection and vaccine effectiveness against SARS-CoV-2 infection in persons without major illness.

| <b>Vaccine Group</b>           | <b>HR</b> | <b>95% CI</b> | <b>VE (%)</b> | <b>95% CI</b> | <b><i>p</i>-value</b> |
|--------------------------------|-----------|---------------|---------------|---------------|-----------------------|
| <b>unvaccinated</b>            | 1.00      |               | 0.0           |               |                       |
| <b>MVC-3-dose<sup>a</sup></b>  | 0.56      | 0.50–0.63     | 44.0          | 36.7%–50.5%   | <.0001                |
| <b>MVC-primary<sup>b</sup></b> | 0.62      | 0.57–0.68     | 37.8          | 31.9%–43.1%   | <.0001                |
| <b>MVC-booster<sup>c</sup></b> | 0.61      | 0.56–0.66     | 39.2          | 33.7%–44.3%   | <.0001                |
| <b>MMB</b>                     | 0.52      | 0.48–0.57     | 47.7          | 42.6%–52.4%   | <.0001                |
| <b>MMM</b>                     | 0.57      | 0.55–0.60     | 43.0          | 40.3%–45.5%   | <.0001                |
| <b>BBB</b>                     | 0.54      | 0.51–0.58     | 46.0          | 42.3%–49.4%   | <.0001                |
| <b>BBM</b>                     | 0.52      | 0.49–0.56     | 48.0          | 44.5%–51.3%   | <.0001                |
| <b>AAM</b>                     | 0.58      | 0.56–0.61     | 41.7          | 39.3%–44.0%   | <.0001                |
| <b>AAB</b>                     | 0.58      | 0.55–0.61     | 42.2          | 39.3%–45.0%   | <.0001                |
| <b>AMM</b>                     | 0.60      | 0.54–0.66     | 40.3          | 34.1%–45.8%   | <.0001                |

Abbreviation: HR, hazard ratios; CI, confidence interval; VE, vaccine effectiveness; A, ChAdOx1 nCoV-19; M, mRNA-1273; B, BNT162b2; MVC, MVC-COV1901

<sup>a</sup> MVC-3-dose, vaccinees received 3 doses of MVC-COV1901;

<sup>b</sup> MVC-primary, vaccinees received 2 doses of MVC-COV1901 as primary series;

<sup>c</sup> MVC-booster, vaccinees received MVC-COV1901 as the booster.

**Supplementary Table S5B.** Estimated hazard ratio of infection and vaccine effectiveness against SARS-CoV-2 infection in persons with major illness.

| <b>Vaccine Group</b>           | <b>HR</b> | <b>95% CI</b> | <b>VE (%)</b> | <b>95% CI</b> | <b>p-value</b> |
|--------------------------------|-----------|---------------|---------------|---------------|----------------|
| <b>unvaccinated</b>            | 1.00      |               | 0.0           |               |                |
| <b>MVC-3-dose<sup>a</sup></b>  | 0.50      | 0.32–0.78     | 50.2          | 22.2%–68.2%   | 0.00           |
| <b>MVC-primary<sup>b</sup></b> | 0.53      | 0.32–0.88     | 46.9          | 12.0%–67.9%   | 0.01           |
| <b>MVC-booster<sup>c</sup></b> | 0.60      | 0.45–0.78     | 40.4          | 21.7%–54.6%   | 0.00           |
| <b>MMB</b>                     | 0.54      | 0.41–0.72     | 46.1          | 28.5%–59.4%   | <.0001         |
| <b>MMM</b>                     | 0.45      | 0.39–0.51     | 55.5          | 48.8%–61.3    | <.0001         |
| <b>BBB</b>                     | 0.61      | 0.48–0.78     | 38.9          | 21.9%–52.1%   | <.0001         |
| <b>BBM</b>                     | 0.39      | 0.28–0.54     | 61.4          | 46.1%–72.3%   | <.0001         |
| <b>AAM</b>                     | 0.49      | 0.42–0.57     | 51.4          | 43.4%–58.4%   | <.0001         |
| <b>AAB</b>                     | 0.51      | 0.42–0.63     | 48.7          | 37.1%–58.1%   | <.0001         |
| <b>AMM</b>                     | 0.77      | 0.42–1.40     | 23.4          | 0.0%–58.0%    | 0.38           |

Abbreviation: HR, hazard ratios; CI, confidence interval; VE, vaccine effectiveness; A, ChAdOx1 nCoV-19; M, mRNA-1273; B, BNT162b2; MVC, MVC-COV1901

<sup>a</sup> MVC-3-dose, vaccinees received 3 doses of MVC-COV1901;

<sup>b</sup> MVC-primary, vaccinees received 2 doses of MVC-COV1901 as primary series;

<sup>c</sup> MVC-booster, vaccinees received MVC-COV1901 as the booster.



**Supplementary Table S5C.** Estimated hazard ratio of infection and vaccine effectiveness against COVID-19 associated moderate to severe disease in persons without major illness.

| <b>Vaccine Group</b>           | <b>HR</b> | <b>95% CI</b> | <b>VE (%)</b> | <b>95% CI</b> | <b>p-value</b> |
|--------------------------------|-----------|---------------|---------------|---------------|----------------|
| <b>Unvaccinated</b>            | 1.00      |               | 0.0           |               |                |
| <b>MVC-3-dose<sup>a</sup></b>  | 0.28      | 0.13–0.59     | 72.0          | 40.6%–86.8%   | 0.00           |
| <b>MVC-primary<sup>b</sup></b> | 0.19      | 0.08–0.46     | 81.4          | 54.5%–92.4%   | 0.00           |
| <b>MVC-booster<sup>c</sup></b> | 0.37      | 0.26–0.53     | 63.1          | 46.9%–74.4%   | <.0001         |
| <b>MMB</b>                     | 0.08      | 0.04–0.16     | 92.5          | 84.1%–96.5%   | <.0001         |
| <b>MMM</b>                     | 0.18      | 0.15–0.22     | 82.2          | 78.1%–85.5%   | <.0001         |
| <b>BBB</b>                     | 0.10      | 0.05–0.20     | 90.2          | 80.3%–95.1%   | <.0001         |
| <b>BBM</b>                     | 0.14      | 0.07–0.26     | 86.3          | 74.2%–92.7%   | <.0001         |
| <b>AAM</b>                     | 0.30      | 0.24–0.37     | 70.2          | 63.4%–75.7%   | <.0001         |
| <b>AAB</b>                     | 0.31      | 0.24–0.41     | 68.9          | 59.2%–76.3%   | <.0001         |
| <b>AMM</b>                     | 0.11      | 0.03–0.44     | 89.2          | 56.5%–97.3%   | 0.00           |

Abbreviation: HR, hazard ratios; CI, confidence interval; VE, vaccine effectiveness; A, ChAdOx1 nCoV-19; M, mRNA-1273; B, BNT162b2; MVC, MVC-COV1901

<sup>a</sup> MVC-3-dose, vaccinees received 3 doses of MVC-COV1901;

<sup>b</sup> MVC-primary, vaccinees received 2 doses of MVC-COV1901 as primary series;

<sup>c</sup> MVC-booster, vaccinees received MVC-COV1901 as the booster.

**Supplementary Table S5D.** Estimated hazard ratio of infection and vaccine effectiveness against COVID-19 associated moderate to severe disease in persons with major illness.

| <b>Vaccine Group</b>           | <b>HR</b> | <b>95% CI</b>            | <b>VE (%)</b> | <b>95% CI</b> | <b>p-value</b> |
|--------------------------------|-----------|--------------------------|---------------|---------------|----------------|
| <b>Unvaccinated</b>            | 1.00      |                          | 0.0           |               |                |
| <b>MVC-3-dose<sup>a</sup></b>  | 0.39      | 0.14–1.04                | 61.5          | 0.0%–85.8%    | 0.06           |
| <b>MVC-primary<sup>b</sup></b> | 0.37      | 0.09–1.51                | 63.3          | 0.0%–91.0%    | 0.16           |
| <b>MVC-booster<sup>c</sup></b> | 0.27      | 0.12–0.57                | 73.4          | 43.0%–87.6%   | 0.00           |
| <b>MMB</b>                     | 0.19      | 0.08–0.46                | 81.4          | 54.0%–92.5%   | 0.00           |
| <b>MMM</b>                     | 0.26      | 0.19–0.36                | 74.1          | 64.5%–81.2%   | <.0001         |
| <b>BBB</b>                     | 0.44      | 0.24–0.81                | 55.7          | 18.8%–75.8%   | 0.01           |
| <b>BBM</b>                     | 0.29      | 0.13–0.66                | 70.8          | 34.4%–87.0%   | 0.00           |
| <b>AAM</b>                     | 0.38      | 0.27–0.53                | 62.3          | 46.7%–73.3%   | <.0001         |
| <b>AAB</b>                     | 0.33      | 0.20–0.54                | 67.2          | 46.2%–80.0%   | <.0001         |
| <b>AMM</b>                     | 0.00      | 0.00–8×10 <sup>255</sup> | 100.0         | 0.0%–100.0%   | 0.97           |

Abbreviation: HR, hazard ratios; CI, confidence interval; VE, vaccine effectiveness; A, ChAdOx1 nCoV-19;

M, mRNA-1273; B, BNT162b2; MVC, MVC-COV1901

<sup>a</sup> MVC-3-dose, vaccinees received 3 doses of MVC-COV1901;

<sup>b</sup> MVC-primary, vaccinees received 2 doses of MVC-COV1901 as primary series;

<sup>c</sup> MVC-booster, vaccinees received MVC-COV1901 as the booster.

**Supplementary Table S6A.** Estimated hazard ratio of infection and vaccine effectiveness against SARS-CoV-2 infection in persons 20 to 49 years old.

| <b>Vaccine Group</b>           | <b>HR</b> | <b>95% CI</b> | <b>VE (%)</b> | <b>95% CI</b> | <b>p-value</b> |
|--------------------------------|-----------|---------------|---------------|---------------|----------------|
| <b>Unvaccinated</b>            | 1.00      |               | 0.0           |               |                |
| <b>MVC-3-dose<sup>a</sup></b>  | 0.57      | 0.48–0.66     | 43.5          | 34.1%–51.6%   | <.0001         |
| <b>MVC-primary<sup>b</sup></b> | 0.67      | 0.61–0.74     | 32.7          | 25.7%–39.1%   | <.0001         |
| <b>MVC-booster<sup>c</sup></b> | 0.57      | 0.51–0.64     | 43.0          | 35.8%–49.4%   | <.0001         |
| <b>MMB</b>                     | 0.58      | 0.51–0.67     | 41.8          | 33.5%–49.0%   | <.0001         |
| <b>MMM</b>                     | 0.62      | 0.58–0.66     | 38.1          | 33.6%–42.2%   | <.0001         |
| <b>BBB</b>                     | 0.55      | 0.51–0.60     | 44.8          | 40.4%–48.9%   | <.0001         |
| <b>BBM</b>                     | 0.52      | 0.48–0.56     | 47.9          | 43.8%–51.7%   | <.0001         |
| <b>AAM</b>                     | 0.57      | 0.55–0.60     | 42.6          | 39.8%–45.3%   | <.0001         |
| <b>AAB</b>                     | 0.56      | 0.53–0.60     | 43.6          | 40.1%–46.9%   | <.0001         |
| <b>AMM</b>                     | 0.63      | 0.57–0.70     | 37.1          | 30.1%–43.4%   | <.0001         |

Abbreviation: HR, hazard ratios; CI, confidence interval; VE, vaccine effectiveness; A, ChAdOx1 nCoV-19;

M, mRNA-1273; B, BNT162b2; MVC, MVC-COV1901

<sup>a</sup> MVC-3-dose, vaccinees received 3 doses of MVC-COV1901;

<sup>b</sup> MVC-primary, vaccinees received 2 doses of MVC-COV1901 as primary series;

<sup>c</sup> MVC-booster, vaccinees received MVC-COV1901 as the booster

**Supplementary Table S6B.** Estimated hazard ratio of infection and vaccine effectiveness against SARS-CoV-2 infection in persons 50 to 64 years old.

| <b>Vaccine Group</b>           | <b>HR</b> | <b>95% CI</b> | <b>VE (%)</b> | <b>95% CI</b> | <b><i>p</i>-value</b> |
|--------------------------------|-----------|---------------|---------------|---------------|-----------------------|
| <b>Unvaccinated</b>            | 1.00      |               | 0.0           |               |                       |
| <b>MVC-3-dose<sup>a</sup></b>  | 0.60      | 0.48–0.75     | 40.0          | 25.0%–52.0%   | <.0001                |
| <b>MVC-primary<sup>b</sup></b> | 0.63      | 0.51–0.79     | 36.6          | 20.9%–49.3%   | <.0001                |
| <b>MVC-booster<sup>c</sup></b> | 0.71      | 0.60–0.83     | 29.5          | 16.9%–40.2%   | <.0001                |
| <b>MMB</b>                     | 0.73      | 0.61–0.88     | 26.6          | 11.6%–39.1%   | 0.00                  |
| <b>MMM</b>                     | 0.72      | 0.65–0.79     | 28.5          | 21.4%–35.0%   | <.0001                |
| <b>BBB</b>                     | 0.70      | 0.61–0.79     | 30.5          | 21.3%–38.7%   | <.0001                |
| <b>BBM</b>                     | 0.63      | 0.55–0.72     | 37.4          | 28.5%–45.2%   | <.0001                |
| <b>AAM</b>                     | 0.66      | 0.60–0.72     | 34.1          | 27.9%–39.9%   | <.0001                |
| <b>AAB</b>                     | 0.68      | 0.61–0.76     | 32.0          | 24.3%–38.8%   | <.0001                |
| <b>AMM</b>                     | 0.67      | 0.52–0.87     | 32.8          | 12.7%–48.2%   | 0.00                  |

Abbreviation: HR, hazard ratios; CI, confidence interval; VE, vaccine effectiveness; A, ChAdOx1 nCoV-19;

M, mRNA-1273; B, BNT162b2; MVC, MVC-COV1901

<sup>a</sup> MVC-3-dose, vaccinees received 3 doses of MVC-COV1901;

<sup>b</sup> MVC-primary, vaccinees received 2 doses of MVC-COV1901 as primary series;

<sup>c</sup> MVC-booster, vaccinees received MVC-COV1901 as the booster

**Supplementary Table S6C.** Estimated hazard ratio of infection and vaccine effectiveness against SARS-CoV-2 infection in persons 65 to 74 years old.

| <b>Vaccine Group</b>           | <b>HR</b> | <b>95% CI</b> | <b>VE (%)</b> | <b>95% CI</b> | <b><i>p</i>-value</b> |
|--------------------------------|-----------|---------------|---------------|---------------|-----------------------|
| <b>Unvaccinated</b>            | 1.00      |               | 0.0           |               |                       |
| <b>MVC-3-dose<sup>a</sup></b>  | 0.73      | 0.48–1.12     | 26.7          | 0.0%–52.3%    | 0.15                  |
| <b>MVC-primary<sup>b</sup></b> | 0.50      | 0.30–0.84     | 50.1          | 16.4%–70.2%   | 0.01                  |
| <b>MVC-booster<sup>c</sup></b> | 0.60      | 0.49–0.74     | 40.0          | 25.9%–51.5%   | <.0001                |
| <b>MMB</b>                     | 0.41      | 0.34–0.49     | 59.3          | 50.7%–66.3%   | <.0001                |
| <b>MMM</b>                     | 0.49      | 0.44–0.55     | 50.6          | 44.9%–55.7%   | <.0001                |
| <b>BBB</b>                     | 0.47      | 0.33–0.68     | 53.1          | 32.4%–67.5%   | <.0001                |
| <b>BBM</b>                     | 0.51      | 0.35–0.76     | 48.8          | 24.3%–65.4%   | 0.00                  |
| <b>AAM</b>                     | 0.65      | 0.56–0.75     | 35.2          | 24.9%–44.1%   | <.0001                |
| <b>AAB</b>                     | 0.61      | 0.48–0.76     | 39.5          | 24.5%–51.6%   | <.0001                |
| <b>AMM</b>                     | 0.55      | 0.28–1.07     | 45.0          | 0.0%–71.7%    | 0.08                  |

Abbreviation: HR, hazard ratios; CI, confidence interval; VE, vaccine effectiveness; A, ChAdOx1 nCoV-19;

M, mRNA-1273; B, BNT162b2; MVC, MVC-COV1901

<sup>a</sup> MVC-3-dose, vaccinees received 3 doses of MVC-COV1901;

<sup>b</sup> MVC-primary, vaccinees received 2 doses of MVC-COV1901 as primary series;

<sup>c</sup> MVC-booster, vaccinees received MVC-COV1901 as the booster

**Supplementary Table S6D.** Estimated hazard ratio of infection and vaccine effectiveness against SARS-CoV-2 infection in persons > 75 years old.

| <b>Vaccine Group</b>           | <b>HR</b> | <b>95% CI</b> | <b>VE (%)</b> | <b>95% CI</b> | <b>p-value</b> |
|--------------------------------|-----------|---------------|---------------|---------------|----------------|
| <b>Unvaccinated</b>            | 1.00      |               | 0.0           |               |                |
| <b>MVC-3-dose<sup>a</sup></b>  | 0.66      | 0.33–1.32     | 34.3          | 0.0%–67.3%    | 0.24           |
| <b>MVC-primary<sup>b</sup></b> | 0.56      | 0.21–1.50     | 44.1          | 0.0%–79.2%    | 0.25           |
| <b>MVC-booster<sup>c</sup></b> | 0.70      | 0.53–0.93     | 29.6          | 7.0%–46.7%    | 0.01           |
| <b>MMB</b>                     | 0.46      | 0.32–0.65     | 54.0          | 34.7%–67.6%   | <.0001         |
| <b>MMM</b>                     | 0.52      | 0.45–0.61     | 48.0          | 39.2%–55.5%   | <.0001         |
| <b>BBB</b>                     | 0.38      | 0.18–0.80     | 62.1          | 20.1%–82.0%   | 0.01           |
| <b>BBM</b>                     | 0.12      | 0.02–0.84     | 88.2          | 16.4%–98.3%   | 0.03           |
| <b>AAM</b>                     | 0.68      | 0.58–0.79     | 32.2          | 21.0%–41.7%   | <.0001         |
| <b>AAB</b>                     | 0.64      | 0.53–0.77     | 36.2          | 22.6%–47.4%   | <.0001         |
| <b>AMM</b>                     | 0.52      | 0.13–2.07     | 48.5          | 0.0%–87.2%    | 0.35           |

Abbreviation: HR, hazard ratios; CI, confidence interval; VE, vaccine effectiveness; A, ChAdOx1 nCoV-19;

M, mRNA-1273; B, BNT162b2; MVC, MVC-COV1901

<sup>a</sup> MVC-3-dose, vaccinees received 3 doses of MVC-COV1901;

<sup>b</sup> MVC-primary, vaccinees received 2 doses of MVC-COV1901 as primary series;

<sup>c</sup> MVC-booster, vaccinees received MVC-COV1901 as the booster

**Supplementary Table S7A.** Estimated hazard ratio of infection and vaccine effectiveness against COVID-19 associated moderate to severe disease in persons 20 to 49 years old.

| <b>Vaccine Group</b>           | <b>HR</b> | <b>95% CI</b> | <b>VE (%)</b> | <b>95% CI</b> | <b><i>p</i>-value</b> |
|--------------------------------|-----------|---------------|---------------|---------------|-----------------------|
| <b>Unvaccinated</b>            | 1.00      |               | 0.0           |               |                       |
| <b>MVC-3-dose<sup>a</sup></b>  | 0.41      | 0.13–1.33     | 58.7          | 0.0%–87.2%    | 0.14                  |
| <b>MVC-primary<sup>b</sup></b> | 0.33      | 0.13–0.85     | 67.1          | 15.0%–87.2%   | 0.02                  |
| <b>MVC-booster<sup>c</sup></b> | 0.15      | 0.04–0.60     | 85.3          | 39.6%–96.4%   | 0.01                  |
| <b>MMB</b>                     | 0.24      | 0.06–1.00     | 76.1          | 0.4%–94.3%    | 0.05                  |
| <b>MMM</b>                     | 0.39      | 0.21–0.72     | 61.2          | 28.2%–79.0%   | 0.00                  |
| <b>BBB</b>                     | 0.26      | 0.13–0.52     | 73.7          | 47.9%–86.7%   | 0.00                  |
| <b>BBM</b>                     | 0.22      | 0.10–0.46     | 78.5          | 53.7%–90.0%   | <.0001                |
| <b>AAM</b>                     | 0.23      | 0.14–0.36     | 77.3          | 64.4%–85.6%   | <.0001                |
| <b>AAB</b>                     | 0.20      | 0.11–0.36     | 80.2          | 63.8%–89.2%   | <.0001                |
| <b>AMM</b>                     | 0.17      | 0.04–0.70     | 83.2          | 30.3%–96.0%   | 0.01                  |

Abbreviation: HR, hazard ratios; CI, confidence interval; VE, vaccine effectiveness; A, ChAdOx1 nCoV-19;

M, mRNA-1273; B, BNT162b2; MVC, MVC-COV1901

<sup>a</sup> MVC-3-dose, vaccinees received 3 doses of MVC-COV1901;

<sup>b</sup> MVC-primary, vaccinees received 2 doses of MVC-COV1901 as primary series;

<sup>c</sup> MVC-booster, vaccinees received MVC

**Supplementary Table S7B.** Estimated hazard ratio of infection and vaccine effectiveness against COVID-19 associated moderate to severe disease in persons 50 to 64 years old.

| <b>Vaccine Group</b>           | <b>HR</b> | <b>95% CI</b>               | <b>VE (%)</b> | <b>95% CI</b> | <b><i>p</i>-value</b> |
|--------------------------------|-----------|-----------------------------|---------------|---------------|-----------------------|
| <b>Unvaccinated</b>            | 1.00      |                             | 0.0           |               |                       |
| <b>MVC-3-dose<sup>a</sup></b>  | 0.11      | 0.03–0.44                   | 89.3          | 56.2%–97.4%   | 0.00                  |
| <b>MVC-primary<sup>b</sup></b> | 0.07      | 0.01–0.47                   | 93.5          | 53.0%–99.1%   | 0.01                  |
| <b>MVC-booster<sup>c</sup></b> | 0.30      | 0.15–0.60                   | 70.1          | 39.7%–85.1%   | 0.00                  |
| <b>MMB</b>                     | 0.05      | 0.01–0.35                   | 95.2          | 65.4%–99.3%   | 0.00                  |
| <b>MMM</b>                     | 0.12      | 0.07–0.21                   | 87.7          | 79.4%–92.7%   | <.0001                |
| <b>BBB</b>                     | 0.12      | 0.06–0.25                   | 88.1          | 74.7%–94.4%   | <.0001                |
| <b>BBM</b>                     | 0.13      | 0.06–0.28                   | 87.1          | 72.4%–93.9%   | <.0001                |
| <b>AAM</b>                     | 0.14      | 0.09–0.22                   | 86.2          | 78.2%–91.3%   | <.0001                |
| <b>AAB</b>                     | 0.19      | 0.11–0.33                   | 81.0          | 67.4%–88.9%   | <.0001                |
| <b>AMM</b>                     | 0.00      | 0.00–6.93×10 <sup>185</sup> | 100.0         | 0.0%–100%     | 0.95                  |

Abbreviation: HR, hazard ratios; CI, confidence interval; VE, vaccine effectiveness; A, ChAdOx1 nCoV-19;

M, mRNA-1273; B, BNT162b2; MVC, MVC-COV1901

<sup>a</sup> MVC-3-dose, vaccinees received 3 doses of MVC-COV1901;

<sup>b</sup> MVC-primary, vaccinees received 2 doses of MVC-COV1901 as primary series;

<sup>c</sup> MVC-booster, vaccinees received MVC-COV1901 as the booster



**Supplementary Table S7C.** Estimated hazard ratio of infection and vaccine effectiveness against COVID-19 associated moderate to severe disease in persons 65 to 74 years old.

| <b>Vaccine Group</b>           | <b>HR</b> | <b>95% CI</b>               | <b>VE (%)</b> | <b>95% CI</b> | <b>p-value</b> |
|--------------------------------|-----------|-----------------------------|---------------|---------------|----------------|
| <b>Unvaccinated</b>            | 1.00      |                             | 0.0           |               |                |
| <b>MVC-3-dose<sup>a</sup></b>  | 0.82      | 0.33–2.02                   | 17.9          | 0.0%–66.6%    | 0.67           |
| <b>MVC-primary<sup>b</sup></b> | 0.00      | 0.00–5.21×10 <sup>279</sup> | 100           | 0.0%–100.0%   | 0.97           |
| <b>MVC-booster<sup>c</sup></b> | 0.32      | 0.17–0.60                   | 67.7          | 39.8%–82.7%   | 0.00           |
| <b>MMB</b>                     | 0.12      | 0.06–0.26                   | 88.0          | 73.8%–94.5%   | <.0001         |
| <b>MMM</b>                     | 0.21      | 0.16–0.27                   | 79.4          | 72.7%–84.5%   | <.0001         |
| <b>BBB</b>                     | 0.07      | 0.01–0.51                   | 92.8          | 48.7%–99.0%   | 0.01           |
| <b>BBM</b>                     | 0.18      | 0.05–0.72                   | 82.0          | 27.6%–95.5%   | 0.02           |
| <b>AAM</b>                     | 0.40      | 0.26–0.61                   | 60.0          | 38.7%–73.9%   | <.0001         |
| <b>AAB</b>                     | 0.47      | 0.25–0.87                   | 53.0          | 12.8%–74.7%   | 0.02           |
| <b>AMM</b>                     | N/A       | N/A                         | N/A           | N/A           | N/A            |

Abbreviation: HR, hazard ratios; CI, confidence interval; VE, vaccine effectiveness; A, ChAdOx1 nCoV-19; M, mRNA-1273; B, BNT162b2; MVC, MVC-COV1901

<sup>a</sup> MVC-3-dose, vaccinees received 3 doses of MVC-COV1901;

<sup>b</sup> MVC-primary, vaccinees received 2 doses of MVC-COV1901 as primary series;

<sup>c</sup> MVC-booster, vaccinees received MVC-COV1901 as the booster

**Supplementary Table S7D.** Estimated hazard ratio of infection and vaccine effectiveness against COVID-19 associated moderate to severe disease in persons > 75 years old.

| <b>Vaccine Group</b>           | <b>HR</b> | <b>95% CI</b>              | <b>VE (%)</b> | <b>95% CI</b> | <b>p-value</b> |
|--------------------------------|-----------|----------------------------|---------------|---------------|----------------|
| <b>Unvaccinated</b>            | 1.00      |                            | 0.0           |               |                |
| <b>MVC-3-dose<sup>a</sup></b>  | 0.20      | 0.03–1.40                  | 80.4          | 0.0%–97.3%    | 0.10           |
| <b>MVC-primary<sup>b</sup></b> | 0.37      | 0.05–2.66                  | 62.7          | 0.0%–94.8%    | 0.33           |
| <b>MVC-booster<sup>c</sup></b> | 0.53      | 0.33–0.87                  | 46.7          | 12.7%–67.4%   | 0.01           |
| <b>MMB</b>                     | 0.07      | 0.02–0.28                  | 93.2          | 72.3%–98.3%   | 0.00           |
| <b>MMM</b>                     | 0.23      | 0.17–0.31                  | 77.3          | 69.2%–83.3%   | <.0001         |
| <b>BBB</b>                     | 0.24      | 0.06–0.97                  | 75.8          | 3.0%–94.0%    | 0.05           |
| <b>BBM</b>                     | 0.00      | 0.0–1.43×10 <sup>270</sup> | 100.0         | 0.0%–100.0%   | 0.97           |
| <b>AAM</b>                     | 0.51      | 0.39–0.66                  | 49.3          | 33.8%–61.2%   | <.0001         |
| <b>AAB</b>                     | 0.50      | 0.35–0.70                  | 50.2          | 30.0%–64.6%   | <.0001         |
| <b>AMM</b>                     | 0.00      | 0.00–0.00                  | 100.0         | 100.0%–100.0% | 0.98           |

Abbreviation: HR, hazard ratios; CI, confidence interval; VE, vaccine effectiveness; A, ChAdOx1 nCoV-19;

M, mRNA-1273; B, BNT162b2; MVC, MVC-COV1901

<sup>a</sup> MVC-3-dose, vaccinees received 3 doses of MVC-COV1901;

<sup>b</sup> MVC-primary, vaccinees received 2 doses of MVC-COV1901 as primary series;

<sup>c</sup> MVC-booster, vaccinees received MVC-COV1901 as the booster
